# Supplementary material for: Anemia in Pregnant Women and Children Aged 6 to 59 Months Living in Mozambique and Portugal: An Overview of Systematic Reviews
Source: Int J Environ Res Public Health. 2022 Apr 13;19(8):4685. doi: 10.3390/ijerph19084685 (PMC9029497; doi:10.3390/ijerph19084685)
Supplement: Supplementary file 1 [file ijerph-19-04685-s001.zip › Supplementary files S1-S7_Anemia in pregnant women and children aged six to 59 months April 2022 .xlsx]

## Sheet: Supplementary file 1.  Methodol
Supplementary file 1. Methodological quality evaluation of the 20 articles included
Reference No.	Author	Items
		Title and abstract	Introduction -Background	Introduction-Objectives	Methods-Study design	Methods-Setting	Methods-Participants	Methods-Variables	Methods-Data sources	Methods-Bias	Methods-Study size	Methods-Quantitative variables	Methods-Statistical methods	Results-Participants	Results-Descriptive data	Results-Outcome data	Results-Main results	Results-Other analysis	Discussion-Key results	Discussion-Limitations	Discussion-Interpretation	Discussion-Generalisability	Other information - Funding
42	Vos Theo et al.	1	1	1	1	1	1	1	1	1	1	1	1	1	1	1	1	1	1	1	1	1	1
43	Vos Theo et al.	1	1	1	1	1	1	1	1	1	1	1	1	1	1	1	1	1	1	1	1	1	1
35	Gaffey et al.	1	1	1	1	1	1	1	1	0	0	1	0	1	1	1	1	1	1	0	1	1	1
40	Vos Theo et al.	1	1	1	1	1	1	1	1	1	1	1	1	1	1	1	1	1	1	1	1	1	1
33	Black et al.	0	1	1	1	1	1	1	1	0	1	1	1	1	1	1	1	1	1	1	1	1	1
44	Wang et al.	1	1	1	1	1	1	1	1	1	1	1	1	1	1	1	1	1	1	1	1	1	1
47	Stanaway et al.	1	1	1	1	1	1	1	1	1	1	1	1	1	1	1	1	1	1	1	1	1	1
31	Arsenault et al.	1	1	1	1	1	1	1	1	1	1	1	1	1	1	1	1	1	1	1	1	1	1
37	Langer et al.	1	1	1	1	1	1	1	1	1	1	1	1	1	1	1	1	1	1	1	1	1	1
36	Ruel et al.	1	1	1	1	1	1	1	1	1	1	1	0	1	1	1	1	1	1	0	1	1	1
32	Bhutta et al.	1	1	1	1	1	1	1	1	1	1	1	1	1	1	1	1	1	1	1	1	1	1
45	Naghavi et al.	1	1	1	1	1	1	1	1	1	1	1	1	1	1	1	1	1	1	1	1	1	1
30	Balarajan et al.	1	1	1	1	1	1	1	1	0	1	1	1	1	1	1	1	1	1	1	1	1	1
34	Duncan, Burris	1	1	1	0	1	1	1	1	0	0	1	0	1	1	1	1	1	1	0	1	1	0
41	Forouzanfar et al	1	1	1	1	1	1	1	1	1	1	1	1	1	1	1	1	1	1	1	1	1	1
46	Gakidou et al.	1	1	1	1	1	1	1	1	1	1	1	1	1	1	1	1	1	1	1	1	1	1
39	De-Regil et al.	1	1	1	1	1	1	1	1	1	1	1	1	1	1	1	1	1	1	1	1	1	1
28	González et al.	1	1	1	1	1	1	1	1	1	1	1	1	1	1	1	1	1	1	1	1	1	1
29	Radeva-Petrova et al.	1	1	1	1	1	1	1	1	1	1	1	1	1	1	1	1	1	1	1	1	1	1
38	Diaz et al.	1	1	1	1	1	1	1	1	1	1	1	1	1	1	1	1	1	1	1	1	1	1
-	Proportion of articles that include the item (%)	95	100	100	95	100	100	100	100	80	90	100	85	100	100	100	100	100	100	85	100	100	95
	Notes:	(0) - Item not included/missing in the article; (1) - Item included in the article

## Sheet: Supplementary file 2.  Methodol
	Supplementary file 2. Methodological quality evaluation of articles included, by using STROBE Statement checklist included using STROBE Statement checklist
	ITEM	PROPORTION(%)
	Title and abstract	95
	Background	100
	Objetives	100
	Study design	95
	Setting	100
	Methods Participants	100
	Variables	100
	Data sources	100
	Bias	80
	Study size	90
	Quantitative variables	100
	Statistical methods	85
	Results-Participants	100
	Descriptive data	100
	Outcome data	100
	Main results	100
	Other analysis	100
	Key results	100
	Limitations	85
	Interpretation	100
	Generalisability	100
	Funding	95

## Sheet: Supplementary file 2.1 Quality 
AMSTAR 2 Critical Appraisal Tool (*)	Table Assessment of the quality of Included studies, by all AMSTAR2 domains
	(Author, Year)
	Vos Theo et al., 2017			Vos Theo et al., 2016			Vos Theo et al., 2015			Wang et al., 2016				Stanaway et al., 2018		Naghavi et al., 2017			Forouzanfar et al., 2015			Gakidou et al., 2017			Gaffey et al., 2015			Black et al., 2013			Arsenault et al., 2018			Ruel et al., 2018			Bhutta et al., 2013			Balajaran et al., 2011			Duncan 2009			González et al., 2018			Radeva-Petrova et. al., 2014
	YES	Partially Yes	NO	YES	Partially Yes	NO	YES	Partially Yes	NO	YES	Partially Yes	NO	YES	Partially Yes	NO	YES	Partially Yes	NO	YES	Partially Yes	NO	YES	Partially Yes	NO	YES	Partially Yes	NO	YES	Partially Yes	NO	YES	Partially Yes	NO	YES	Partially Yes	NO	YES	Partially Yes	NO	YES	Partially Yes	NO	YES	Partially Yes	NO	YES	Partially Yes	NO	YES
1. Did the research questions and inclusion criteria for the review include the components of PICO?	X	-	-	X	-	-	X	-	-	X	-	-	X	-	-	X	-	-	X	-	-	X	-	-	X	-	-	X	-	-	X	-	-	X	-	-	X	-	-	X	-	-	X	-	-	X	-	-	X
2. Did the report of the review contain an explicit statement that the review methods were established prior to the conduct of the review and did the report justify any significant deviations from the protocol?	X	-	-	X	-	-	X	-	-	-	X	-	X	-	-	X	-	-	-	X	-	X	-	-	X	-	X	X	-	X	-	X	-	-	X	-	X	-	-	-	X	-	X	-	X	X	-	-	X
3. Did the review authors explain their selection of the study designs for inclusion in the review?	X	-	-	X	-	-	X	-	-	X	-	-	X	-	-	X	-	-	X	-	-	X	-	-	X	-	-	X	-	-	X		-	X	-	-	X	-	-	-	-	X	-	-	X	X	-	-	X
4. Did the review authors use a comprehensive literature search strategy?	X	-	-	X	-	-	X	-	-	X	-	-	X	-	-	X	-	-	X	-	-	X	-	-	-	X	-	-	X	-	-	X	-	-	X	-	X	-	-	-	X	-	-	-	X	X	-	-	X
5. Did the review authors perform study selection in duplicate?	X	-	-	X	-	-	X	-	-	X	-	-	X	-	-	X	-	-	X	-	-	X	-	-	X	-	-	X	-	-	X	-	-	X		-	X	-	-	X	-	-	-	-	X	X	-	-	X
6. Did the review authors perform data extraction in duplicate?	X	-	-	X	-	-	X	-	-	X	-	-	X	-	-	X	-	-	X	-	-	X	-	-	X	-	-	X	-	-	X	-	-	X		-	X	-	-	X	-	-	-	-	X	X	-	-	X
7. Did the review authors provide a list of excluded studies and justify the exclusions?	-	X	-	-	X	-		X	-	X	-	-	-	X	-	-	X	-	-	X	-	X	-	-	-	-	X	-	X	-	-	-	X	-	X	-	-	X	-	-	-	X	-	-	X	X	-	-	X
8. Did the review authors describe the included studies in adequate detail?	X	-	-	X	-	-	X	-	-	X	-	-	X	-	-	-	X	-	X	-	-	X	-	-	-	X	-	-	X	-	-	X	-	X	-	-	X	-	-	-	X	-	-	X	-	X	-	-	X
9. Did the review authors use a satisfactory technique for assessing the risk of bias (RoB) in individual studies that were included in the review? (RCT/NRSI)	X	-	-	-	X	-	X	-	X	X	-	X	X	-	-	X	-	-	X	-	-	X	-	-	-		X	-	-	X	X	-	X	-	-	X	X	-	-	-	-	X	-	-	X	X	-	-	X
10. Did the review authors report on the sources of funding for the studies included in the review?	X	-	-	X	-	-	X	-	-	X	-	-	X	-	-	X	-	-	X	-	-	X	-	-	X	-	-	X	-	-	X	-	-	X	-	-	X	-	-	X	-	-	X	-	-	X	-	-	X
11. If meta-analysis was performed did the review authors use appropriate methods for statistical combination of results? (RCT/NRSI)	X	-	X	X	-	X	X	-	X	-	-	X	X	-	-	X	-	-	X	-	-	X	-	-	-	-	-	-	-	-	X	-	-	-	-	-	X	-	-	-	-	-	-	-	-	X	-	-	X
12. If meta-analysis was performed, did the review authors assess the potential impact of RoB in individual studies on the results of the meta-analysis or other evidence synthesis?	X	-	-	X	-	-	X	-	-	-	-	X	X	-	-	X	-	-	X	-	-	X	-	-	-	-	-	-	-	-	-	-	X	-	-	-	-	-	X	-	-	-	-	-	-	X	-	-	X
13. Did the review authors account for RoB in individual studies when interpreting/ discussing the results of the review?	X	-	-	X	-	-	X	-	-	X	-	-	X	-	-	X	-	-	X	-	-	X	-	-	-	-	X	-	-	X	X	-	-	X	-	-	X	-	-	-	-	X	-	-	X	X	-	-	X
14. Did the review authors provide a satisfactory explanation for, and discussion of, any heterogeneity observed in the results of the review?	X	-	-	X	-	-	X	-	-	X	-	-	X	-	-	X	-	-	-	X	-	X	-	-	X	-	-	X	-	X	X	-	-	X	-	-	X	-	-	-	-	X	-	-	X	X	-	-	X
15. If they performed quantitative synthesis did the review authors carry out an adequate investigation of publication bias (small study bias) and discuss its likely impact on the results of the review?	X	-	-	X	-	-	X	-	-	X	-	-	X	-	-	X	-	-	X	-	-	X	-	-	-	-	-	-	-	-	-	-	X	-	-	X	-	-	X	-	-	X	-	-	X	X	-	-	X
16. Did the review authors report any potential sources of conflict of interest, including any funding they received for conducting the review?	X	-	-	X	-	-	X	-	-	X	-	-	X	-	-	X	-	-	X	-	-	X	-	-	X	-	-	X	-	-	X	-	-	X	-	-	X	-	-	X	-	-	-	-	X	X	-	-	X
AMSTAR 2 Critical Appraisal Results	High			High			High			High			High			High			High			High			Critially Low			Critially Low			Critially Low			Critially Low			Low			Critially Low			Critially Low			High			High
Note: (*) Shea BJ, Reeves BC, Wells G, Thuku M, Hamel C, Moran J, Moher D, Tugwell P, Welch V, Kristjansson E, Henry DA. AMSTAR 2: a critical appraisal tool for systematic reviews that include randomised or non-randomised studies of healthcare interventions, or both. BMJ. 2017 Sep 21;358:j4008.
[truncated: 11 more columns]

## Sheet: Supplementary file 2.2 Quality 
AMSTAR 2 Critical Appraisal Tool (*)	Table Assessment of the quality of Included studies, by 7 AMSTAR2 critical domains (%)
	(Author, Year)
	N			(%)
	YES	Partially Yes	NO	YES	Partially Yes	NO
1. Explicit PICO elements	20	0	0	100	0	0
2. Prior establishment of review protocol	15	5	0	75	25	0
3. Justification for selection of the study designs	17	0	3	85	0	15
4. Comprehensive literature search strategy	14	5	1	70	25	5
5. Study selection in duplicate	19	0	1	95	0	5
6. Data extraction in duplicate	19	0	1	95	0	5
7. List of excluded studies and justification	6	9	5	30	45	25
8. Adequate description of included studies	13	7	0	65	35	0
9.Use of satisfactory technique for assessing the risk of bias (RoB)	13	1	6	65	5	30
10. Reporting sources of funding	19	0	1	95	0	5
11. Appropriateness of meta-analysis methods	13	0	2	86.6667	0	13.3333
12.Assessment of the potential impact of RoB on the results	16	0	4	80	0	20
13. Discussion of RoB in interpretation of results	15	0	5	75	0	25
14. Exploration and discussion of heterogeneity	16	1	3	80	5	15
15. Investigation and discussion of publication bias	12	0	5	70.5882	0	29.4118
16. Reporting of conflict of interest	19	0	1	95	0	5
Note: (*) Shea BJ, Reeves BC, Wells G, Thuku M, Hamel C, Moran J, Moher D, Tugwell P, Welch V, Kristjansson E, Henry DA. AMSTAR 2: a critical appraisal tool for systematic reviews that include randomised or non-randomised studies of healthcare interventions, or both. BMJ. 2017 Sep 21;358:j4008.

## Sheet: Supplementary file 2.2 Quality1
	Yes	Partially Yes	No
1. Explicit PICO elements	100	0	0
2. Prior establishment of review protocol	75	25	0
3. Justification for selection of the study designs	85	0	15
4. Comprehensive literature search strategy	70	25	5
5. Study selection in duplicate	95	0	5
6. Data extraction in duplicate	95	0	5
7. List of excluded studies and justification	30	45	25
8. Adequate description of included studies	65	35	0
9.Use of satisfactory technique for assessing the risk of bias (RoB)	65	5	30
10. Reporting sources of funding	95	0	5
11. Appropriateness of meta-analysis methods	86.6667	0	13.3333
12.Assessment of the potential impact of RoB on the results	80	0	20
13. Discussion of RoB in interpretation of results	75	0	25
14. Exploration and discussion of heterogeneity	80	5	15
15. Investigation and discussion of publication bias	70.5882	0	29.4118
16. Reporting of conflict of interest	95	0	5

## Sheet: Supplementary file 3. Descripti
Suplementary file 3. Description of the 20 articles included, by year of publication, country's mention, target group, country's specific findings, period of study, analysis performed, and general findings.
Reference No.	Author	Year of Publication	Mentions on Mozambique/Portugal	Target Group	Mozambique/ Portugal Specific Findings	Period of anaylsis/ Analysis performed	General findings related to anemia
47	Stanaway et al.	2018	Mozambique & Portugal	Children under 5 years & Women in reproductive age	No specific country findings for anemia were presented; *Globally in 2017, dietary risks were the leading Level 2 risk factor for deaths.	All sub causes of maternal disorders were added as outcomes of iron deficiency (the risk), leading to higher estimates of the burden attributable to iron deficiency among women of reproductive age; Dietary iron deficiency (the cause) is expressed in terms of prevalence and YLDs, but the exposure to iron deficiency (the risk) remained expressed as the counterfactual hemoglobin concentration that w…	“The global burden disease cause name was changed from “iron-deficiency anaemia” to “dietary iron deficiency” to clarify the focus on inadequate intake and exclusion of other causes that can manifest as absolute or functional iron deficiency”(Stanaway et al., 2018, p.1937); “Although the risk factor name remained “iron deficiency”, the exposure estimates were expanded to include all iron deficien…
46	Gakidou et al.	2017	Mozambique & Portugal	Pregnant women, Children and Adults	No specific country findings for anemia were presented.	Period:1990-2016;The comparative risk assessment framework developed for previous iterations of the global burden of disease(GBD) was used to estimate levels and trends in exposure, attributable deaths, and attributable disability-adjusted life-years (DALYs), by age group, sex, year, and location for 84 behavioral, environmental and occupational, and metabolic risks or clusters of risks from 1990…	“Research published on iron-deficiency anemia differed from the global burden of disease (GBD) in methods and definitions, resulting in generally higher GBD estimates” (Gakidou et al., 2017, p.1411); “For deaths, the proportion attributable to measured risk factors, such as communicable, maternal, neonatal, and nutritional causes was 57·9% (55·4–61·0)”(Gakidou et al., 2017, p.1365); “Risk modific…
45	Naghavi et al.	2017	Mozambique & Portugal	Children under 5 years & Young adults and adults (15-70 years)	Neither iron-deficiency anemia nor nutritional deficiencies were among the ten leading causes of total YLLs (with the ratio of observed YLLs to YLLs expected on the basis of SDI in 2016) in Mozambique and Portugal; No specific country findings for anemia were presented.	Period: 2006-2016; Estimations of cause-specific deaths and years of life lost (YLLs) by age, sex, geography, and year. After generating underlying cause of death estimates and accompanying uncertainty, these models were combined into estimates that are consistent with the levels of all-cause mortality estimated for each age-sex-year-location group using a cause of death correction procedure (CoD…	“Globally, age-standardized YLL rates have declined since 1980—particularly for communicable, maternal, neonatal, and nutritional diseases.”(Naghavi et al., 2017, p.1152) “Progress toward reducing mortality rates associated with nutritional deficiencies was similar to maternal and neonatal disorders”(Naghavi et al., 2017, p.1178): “age-standardized mortality rates for all nutritional deficiencies…
44	Wang et al.	2016	Mozambique & Portugal	Children under 5 years & Young adults and adults (15-70 years)	Neither iron-deficiency anemia nor nutritional deficiencies were among the ten leading causes of YLLs (with the ratio of observed YLLs to YLLs expected on the basis of SDI in 2015) in Mozambique and Portugal;No specific country findings for anemia were presented.	Period:1990-2015; Estimations of global age-standardised death rates for males versus females, by GBD cause; Estimations of years of lost life(YLLs); Social demographic index(SDI) computations	“Anemia is a sequela of various different conditions, some of which are parasitic. Hookworm infections can cause iron-deficiency anemia, which is then recorded as the underlying cause of death.” (Wang et al., 2016, p.1523)
43	Vos Theo et al.	2017	Mozambique & Portugal	Childhood & Women in reproductive age and older women	Ratio of observed YLDs to YLDs on basis of SDI in 2016= 0.98 (anemia was among the 10 leading causes of disability in Mozambique); *Anemia wasn’t among the 10 leading causes of disability in Portugal	Period: 2006-2016; Estimations of anemia prevalence (country-age-sex-year); Years lived with disability computations(age-standardised prevalence YLD rates were calculated with basis on the global burden of diseases reference population); Social demographic index(SDI) computations	Iron-deficiency anemia - was among the leading level 4 causes of age-standardized YLD for Mozambican females in 2016; Iron-deficiency anaemia was among the main conditions contributing to higher YLD rates in women; In childhood, nutritional deficiencies (mostly iron-deficiency anemia) were among the main causes of YLDs.
42	Vos Theo et al.	2016	Mozambique & Portugal	Children younger that 5 years old & Older children; Young adults (15-39 years old)	Ratio of observed YLDs to YLDs on basis of SDI in 2015= 0.71 (anemia was among the 10 leading causes of disability in Mozambique); *Anemia wasn’t among the 10 leading causes of disability in Portugal	Period: 1990-2015; Estimations of anemia prevalence (country-age-sex-year) using Spatiotemporal Gaussian process regression methods; Estimations of anemia at different levels of severity; Years lived with disability computations(age-standardised prevalence YLD rates, ratios of YLD); Social demographic index(SDI) computations	Anemia - most common impairment in global burden diseases (disorder spread across many global burden diseases as sequelae); Iron-deficiency anemia - third leading cause (among 10 causes of years lived with disability -YLDS) & first leading cause in children younger than 5 years & among top 10 causes in older children and adolescents and young adults(15-39 years old); Anemia led to higher rates of…
41	Forouzanfar et al	2015	Mozambique & Portugal	Females and Males	Iron deficiency wasn't among the ten leading risk factors in terms of attributable DALYs for Portugal and Mozambique in 2013 for both sexes combined.	Period:1990-2013; Attributable deaths, years of life lost, years lived with disability, and disability-adjusted life-years (DALYs) were estimated for 79 risks or clusters of risks using the Global burden of diseases 2010 methods. Risk–outcome pairs meeting explicit evidence criteria were assessed for 188 countries for the period 1990–2013 by age and sex using three inputs: risk exposure, relative…	“Iron deficiency accounted for less than 200000 deaths but was a major cause of DALYs due to its crucial role as a cause of anemia.” (Forouzanfar et al., 2015, p.2305)
40	Vos Theo et al.	2015	Mozambique & Portugal	Childhood & Individuals aged 15-49 years and 50-69 years	Iron-deficiency anemia was among the ten causes of years lived with disability in Mozambique (in 2013); *Anemia wasn’t among the 10 leading causes of disability in Portugal	Period:1990-2013; Estimations of anemia prevalence (country-age-sex-year); Estimations of the distribution of mild, moderate, and severe anaemia by cause; Disaggregation of marginal estimates of anemia severity and cause into a complete set of prevalence estimates for cause and severity pairs by using Bayesian contingency table modeling; Years lived with disability(YLD) computations	“By 2013, 49·2% of individuals had mild anaemia, 46·9% had moderate anaemia, and 3·9% had severe anaemia. Iron-deficiency anaemia accounted for 62·6% of all cases and 31·5% of mild, 28·7% of moderate, and 2·4% of severe anaemia”(Vos Theo et al., 2015, p.24); “The next five most common causes of anaemia overall were thalassaemia trait, malaria, gastritis, and duodenitis, other neglected tropical d…
39	De-Regil et al.	2015	Portugal	Cohort study of births (1988-1988) in 10 countries (including Portugal)	No specific country findings for anemia were presented, as the study design of the research was out of the scope of the review.	Systematic review: the Cochrane Pregnancy and Childbirth Group's Trials Register (31 August 2015) and the World Health Organization (WHO) International Clinical Trials Registry Platform (ICTRP) (31 August 2015) was searched and relevant organizations were contacted to identify ongoing and unpublished studies.	The retrospective cohort study of births by Botto (2006) did the monitoring rates of non-transmitable diseases (NTDs) from 1988 to 1998 in Norway, Finland, Northern Netherlands, England and Wales, Ireland, France, Hungary, Italy, Portugal, and Israel (monitoring through 13 birth defects registries) (De-Regil et al., 2015, p.45) It was conducted to evaluate the effectiveness of policies and recomm…
38	Diaz et al.	2018	Portugal	Pregnant women (more specifically women with vaginal deliveries who were admitted in labour; Trial conducted between 2006 and 2007)	There was not report on postpartum anemia (defined as Hb lower than 9 mg/dL).	Systematic review: The Cochrane Pregnancy and Childbirth’s Trials Register (2 February 2018), ClinicalTrials.gov and the WHO International Clinical Trials Registry Platform (ICTRP; 21 March 2018), and the reference lists of studies was searched. All randomised trials, including cluster-randomised trials, evaluating methods for estimating blood loss after vaginal birth were included.Two review aut…	“Depending on the rate of blood loss and other factors, such as pre-existing anemia, untreated postpartum hemorrhage can lead to hypovolaemic shock, multi-organ dysfunction, and maternal death, within two to six hours” (Diaz et al., 2018, p.6); The cluster-randomized trial (Zhang 2010), was conducted between 2006 and 2007 and included 25,381 women with vaginal deliveries who were admitted in labo…
37	Langer et al.	2015	Portugal	Adolescent girls (10-19 years)	No specific country findings for anemia were presented; *In 2013, iron-deficiency anemia was among the top ten causes of disadjusted life years (DALYS) for 10-19 years-old adolescents girls (DALYS=5.1).	Analysis of existing and original evidence about the complex relations between women and health; Analysis of the major economic, environmental, social, political, demographic, and epidemiological transitions happening worldwide, their implications on the health system, and their effects on women and health; Analysis of the health status of girls and women using a life-course approach to show the …	Iron-deficiency anemia is among the most important risk factors for mortality for girls aged 15-19 years, accounting for a substantial portion of DALYs through its contribution to cognitive impairment, susceptibility to infection, and limited work capacity; Iron-deficiency anemia is the second most common cause of DALYs for women aged 15–49 years worldwide, with the greatest burden reported in Af…
36	Ruel et al.	2018	Mozambique	Children (0-3 years for Mozambique’s specific studies)	No specific country findings for anemia were presented	Revision of the nutrition impacts of agricultural programs with new empirical evidence published from 2014 onwards.	“Greater benefits for child nutrition outcomes (including Hb/anemia) are achieved when programs also incorporate actions to improve health and WASH practices and to provide specially formulated fortified products to address children's high nutrient requirements in areas where access to nutrient-rich foods is limited” (Ruel et al., 2018, p.23)
35	Gaffey et al.	2015	Mozambique	Children aged <12 years	No specific country findings for anemia were presented	Period:1990-2015;Revision of global and regional progress towards Millennium Development Goals (MDGs) 4 and 5 with respect to their indicators, drawing on data available from the relevant United Nations inter- agency groups responsible for maternal and child mortality estimation, as well as reports from individual UN agencies and external monitoring groups reporting on MDG progress	Intermittent iron supplementation in children aged <12 years is associated with a 49% lower risk of anemia and a 76% lower risk of iron deficiency; The evidence on the use of micronutrient powders (MNPs) for home fortification suggests a 33% reduction in anemia, a 57% reduction in iron deficiency anemia.
34	Duncan, Burris	2009	Mozambique	Pregnant women and infants	No specific country findings for anemia were presented.	Overview of the state of the world’s children from the late 1970s until the year 2008.	“In 1990, half of the pregnant women in the developing world suffered from iron deficiency anemia.These women were tired and having difficulty doing all the chores of daily living, and were at an increased risk of death in childbirth. Their infants were more likely to be small, with lower birth weights and with impaired development” (Duncan, 2009, p. 312); “Complications from a teen pregnancy are…
33	Black et al.	2013	Mozambique	Children<5years & Pregnant women	No specific country findings for anemia were presented. *Prevalence of stunting (HAZ <–2 Z scores below median) and overweight (BAZ >2 Z scores above median) for highest and lowest wealth quintiles for Mozambique (MICS 2006) were presented	Period: 2013; Results of trials of iron supplementation were used to work out the shift in the population hemoglobin distribution. Shifts' information from a meta-analysis on the effects of iron supplementation among pregnant women and children were applied to the distributions of hemoglobin estimated by Stevens and colleagues and the proportion of pregnant women with anemia whose blood hemoglobi…	“Deficiencies of iodine and iron, together with stunting, can contribute to children not reaching their developmental potential”(Black et al., 2013, p.427); “Suboptimum breastfeeding results in an increased risk for mortality in the first 2 years of life. “(Black et al., 2013, p.427) “Iron deficiency contribute substantially to maternal deaths and maternal iron deficiency is associated with babie…
32	Bhutta et al.	2013	Mozambique	Pregnant women & Children	No specific country findings for anemia were presented	Standard methods were used to do a comprehensive review of potential nutrition-specific interventions to address undernutrition and micronutrient deficiencies in women and children; The potential effect of delivery of these interventions on lives saved in the 34 countries with 90% of the global burden of stunted children was modeled and the effect of various delivery platforms that could enhance …	Reviews showed that folic acid supplementation during pregnancy improved means birth weight, with a 79% reduction in the incidence of megaloblastic anemia; and that iron supplementation to women during pregnancy reported a 70% reduction in anemia at term, a 67% reduction in iron deficiency anemia (IDA), and 19% reduction in the incidence of low birthweight (Bhutta el al., 2013, p.454); A meta-ana…
31	Arsenault et al.	2018	Mozambique	Pregnant women,Women of reproductive age (15–49 years) who had at least one livebirth in the past 2 years (MICS) or 5 years (DHS)	No specific country findings for anemia were presented; *In Mozambique, more than 90% of women accessed skilled antenatal care but less than 60% reported the three services (quality antenatal care). Mozambique had high levels of coverage but low and inequitable levels of quality	The availability of potential indicators of ante-natal care quality in household surveys was assessed.	“Quality antenatal care involves the provision of respectful, evidence-based care including appropriate patient assessments such as history questions, examinations, and diagnostic tests; appropriate preventive and curative treatments (eg, iron supplementation); and patient counseling and education.”(Arsenault et al, 2018,p. e1187 )
30	Balarajan et al.	2011	Mozambique	Children of preschool age (0-5 years) & Pregnant women	Anaemia prevalence in mozambican children of preschool age (0-5 years) was severe(≥40·0%)	Period:1993-2005; Revision of understanding evidence of the epidemiology, clinical assessment, pathophysiology, and consequences of anemia, focusing on women of reproductive age and children in low-income and middle-income countries. Discussion of the multifactorial causes of anemia and the co-occurrence of multiple risk factors in different populations and identify potential barriers to effectiv…	“According to the WHO Global Database of Anemia for 1993-2005, about 293 million children of preschool age and 56 million pregnant women were estimated to be anemic”.(Balajaran et al, 2008, p. 2123). “Africa and Asia were the most heavily affected regions, with Africa having the highest prevalence of anemia, and Asia bearing the greater absolute burden” (Balajaran et. al, 2011, p. 2123)
29	Radeva-Petrova et al.	2014	Mozambique	Pregnant women (Trials, conducted between 1957 and 2008)	Of the two most recent trials, both large, and both administering two doses of sulfadoxine-pyrimethamine(SP), one trial from Mozambique demonstrated a benefit with chemoprevention(ofr maternal outcomes); One trial in Mozambique found a large effect in reducing the risk of cord blood anaemia (RR 0.49, 95% CI 0.30 to 0.80; one trial, 870 participants).	Systematic review: The Cochrane Infectious Diseases Group Specialized Register, CENTRAL, MEDLINE, EMBASE, LILACS, and reference lists up to 1 June 2014 were searched. Two review authors applied inclusion criteria, assessed the risk of bias, and extracted data. Dichotomous outcomes were compared using risk ratios (RR), and continuous outcomes using mean differences (MD); both were presented with 9…	Routine chemoprevention to prevent malaria and its consequences has been extensively tested in randomized control trials, with clinically important benefits on anemia and parasitaemia in the mother, and on birthweight in infants; “For women in their first or second pregnancy, malaria chemoprevention reduces the risk of moderate to severe anemia by around 40% (RR 0.60, 95% CI 0.47 to 0.75; three t…
28	González et al.	2018	Mozambique	Pregnant women (trials, antenatal care clinic settings)	Mefloquine probably results in fewer women anemic at delivery (when compared with sulfadoxine-pyrimethamine);Mefloquine plus cotri- moxazole probably results in little or no difference in maternal anaemia cases at delivery	Period:2010-2013; Systematic review: all records identified by the search strategy were screened by two review authors independently. Inclusion criteria were applied, risk of bias assessed, and data extracted. Trial authors were contacted for additional information when required. Dichotomous outcomes were compared using risk ratios (RRs), count outcomes as incidence rate ratios (IRRs), and contin…	When compared with sulfadoxine-pyrimethamine, mefloquine decreased maternal anemia at delivery (RR 0.84, 95% CI 0.76 to 0.94; 5469 participants, 2 studies; moderate-certainty evidence) (Gonzalez et al., 2018, p.2) When compared with cotrimoxazole, there was no probably effect on maternal anemia at delivery (RR 0.94, 95% CI 0.73 to 1.20; 1197 participants, 2 studies; moderate-certainty evidence),

## Sheet: Supplementary file 4. Table 1
Supplementary file 4: Table 1. Search terms and operators used for the identification of publications in the electronic databases
Electronic databases	Terms and operators
PubMed	MATERNAL ANEMIA OR MATERNAL ANAEMIA OR ANEMIA MATERNA AND CHILDREN FROM SIX TO 59 MONTHS OF AGE OR CRIANCAS DOS SEIS AOS 59 MESES DE IDADE OR NIÑOS DE SEIS A 59 MESES DE EDAD AND IRON DEFICIENCY OR DEFICIENCIA DE FERRO OR DEFICIENCIA DE HIERRO AND NUTRITIONAL INDICATORS OR INDICADORES NUTRICIONAIS OR INDICADORES NUTRICIONALES AND SOCIAL DETERMINANTS OR DETERMINANTES SOCIAIS OR DETERMINANTES SOCIA…
GoogleScholar	MATERNAL ANEMIA OR MATERNAL ANAEMIA OR ANEMIA MATERNA AND CHILDREN FROM SIX TO 59 MONTHS OF AGE OR CRIANCAS DOS SEIS AOS 59 MESES DE IDADE OR NIÑOS DE SEIS A 59 MESES DE EDAD AND IRON DEFICIENCY OR DEFICIENCY DE FERRO OR DEFICIENCIA DE HIERRO AND NUTRITIONAL INDICATORS OR INDICADORES NUTRICIONAIS OR INDICADORES NUTRICIONALES AND SOCIAL DETERMINANTS OR DETERMINANTES SOCIAIS OR DETERMINANTES SOCIAL…
Science Direct	MATERNAL ANEMIA (OR) MATERNAL ANAEMIA (AND) CHILDREN FROM SIX TO 59 MONTHS OF AGE (AND) IRON DEFICIENCY ((AND) NUTRITIONAL INDICATORS (AND) SOCIAL DETERMINANTS
Cochrane	MATERNAL ANEMIA OR MATERNAL ANAEMIA OR ANEMIA MATERNA AND CHILDREN FROM SIX TO 59 MONTHS OF AGE OR CRIANCAS DOS SEIS AOS 59 MESES DE IDADE OR NIÑOS DE SEIS A 59 MESES DE EDAD AND IRON DEFICIENCY OR DEFICIENCIA DE FERRO OR DEFICIENCIA DE HIERRO AND NUTRITIONAL INDICATORS OR INDICADORES NUTRICIONAIS OR INDICADORES NUTRICIONALES AND SOCIAL DETERMINANTS OR DETERMINANTES SOCIAIS OR DETERMINANTES SOCIA…
Scielo	MATERNAL ANEMIA (AND) CHILDREN FROM SIX TO 59 MONTHS OF AGE (AND) IRON DEFICIENCY
Lilacs	(MATERNAL ANEMIA) OR (MATERNAL ANAEMIA) OR (ANEMIA MATERNA) AND (CHILDREN FROM SIX TO 59 MONTHS OF AGE ) OR (NIÑOS DE SEIS A 59 MESES DE EDAD) AND (DEFICIENCIA DE HIERRO) OR (IRON DEFICIENCY) AND (NUTRITIONAL INDICATORS) OR (INDICADORES NUTRICIONALES)
Notes:	Languages used for the search include Portuguese, English and, Spanish.

## Sheet: Supplementary file 5.Table 2
Supplementary file 5: Table 2. Description of the 20 articles included, by year of publication, country's mention, target group, country's specific findings, period of study and analysis performed
Reference No.	Author	Year of Publication	Mentions on Mozambique/ Portugal	Target Group	Mozambique/Portugal Specific Findings	Period of anaylsis/ Analysis performed
47	Stanaway et al.	2018	Mozambique & Portugal	Children under 5 years & Women in reproductive age	No specific country findings for anemia were presented; *Globally in 2017, dietary risks were the leading Level 2 risk factor for deaths.	All sub causes of maternal disorders were added as outcomes of iron deficiency (the risk), leading to higher estimates of the burden attributable to iron deficiency among women of reproductive age; Dietary iron deficiency (the cause) is expressed in terms of prevalence and YLDs, but the exposure to iron deficiency (the risk) remained expressed as the counterfactual hemoglobin concentration that w…
46	Gakidou et al.	2017	Mozambique & Portugal	Pregnant women, Children and Adults	No specific country findings for anemia were presented.	Period:1990-2016;The comparative risk assessment framework developed for previous iterations of the global burden of disease(GBD) was used to estimate levels and trends in exposure, attributable deaths, and attributable disability-adjusted life-years (DALYs), by age group, sex, year, and location for 84 behavioral, environmental and occupational, and metabolic risks or clusters of risks from 1990…
45	Naghavi et al.	2017	Mozambique & Portugal	Children under 5 years & Young adults and adults (15-70 years)	Neither iron-deficiency anemia nor nutritional deficiencies were among the ten leading causes of total YLLs (with the ratio of observed YLLs to YLLs expected on the basis of SDI in 2016) in Mozambique and Portugal; No specific country findings for anemia were presented.	Period: 2006-2016; Estimations of cause-specific deaths and years of life lost (YLLs) by age, sex, geography, and year. After generating underlying cause of death estimates and accompanying uncertainty, these models were combined into estimates that are consistent with the levels of all-cause mortality estimated for each age-sex-year-location group using a cause of death correction procedure (CoD…
44	Wang et al.	2016	Mozambique & Portugal	Children under 5 years & Young adults and adults (15-70 years)	Neither iron-deficiency anemia nor nutritional deficiencies were among the ten leading causes of YLLs (with the ratio of observed YLLs to YLLs expected on the basis of SDI in 2015) in Mozambique and Portugal;No specific country findings for anemia were presented.	Period:1990-2015; Estimations of global age-standardised death rates for males versus females, by GBD cause; Estimations of years of lost life(YLLs); Social demographic index(SDI) computations
43	Vos Theo et al.	2017	Mozambique & Portugal	Childhood & Women in reproductive age and older women	Ratio of observed YLDs to YLDs on basis of SDI in 2016= 0.98 (anemia was among the 10 leading causes of disability in Mozambique); *Anemia wasn’t among the 10 leading causes of disability in Portugal	Period: 2006-2016; Estimations of anemia prevalence (country-age-sex-year); Years lived with disability computations(age-standardised prevalence YLD rates were calculated with basis on the global burden of diseases reference population); Social demographic index(SDI) computations
42	Vos Theo et al.	2016	Mozambique & Portugal	Children younger that 5 years old & Older children; Young adults (15-39 years old)	Ratio of observed YLDs to YLDs on basis of SDI in 2015= 0.71 (anemia was among the 10 leading causes of disability in Mozambique); *Anemia wasn’t among the 10 leading causes of disability in Portugal	Period: 1990-2015; Estimations of anemia prevalence (country-age-sex-year) using Spatiotemporal Gaussian process regression methods; Estimations of anemia at different levels of severity; Years lived with disability computations(age-standardised prevalence YLD rates, ratios of YLD); Social demographic index(SDI) computations
41	Forouzanfar et al	2015	Mozambique & Portugal	Females and Males	Iron deficiency wasn't among the ten leading risk factors in terms of attributable DALYs for Portugal and Mozambique in 2013 for both sexes combined.	Period:1990-2013; Attributable deaths, years of life lost, years lived with disability, and disability-adjusted life-years (DALYs) were estimated for 79 risks or clusters of risks using the Global burden of diseases 2010 methods. Risk–outcome pairs meeting explicit evidence criteria were assessed for 188 countries for the period 1990–2013 by age and sex using three inputs: risk exposure, relative…
40	Vos Theo et al.	2015	Mozambique & Portugal	Childhood & Individuals aged 15-49 years and 50-69 years	Iron-deficiency anemia was among the ten causes of years lived with disability in Mozambique (in 2013); *Anemia wasn’t among the 10 leading causes of disability in Portugal	Period:1990-2013; Estimations of anemia prevalence (country-age-sex-year); Estimations of the distribution of mild, moderate, and severe anaemia by cause; Disaggregation of marginal estimates of anemia severity and cause into a complete set of prevalence estimates for cause and severity pairs by using Bayesian contingency table modeling; Years lived with disability(YLD) computations
39	De-Regil et al.	2015	Portugal	Cohort study of births (1988-1988) in 10 countries (including Portugal)	No specific country findings for anemia were presented, as the study design of the research was out of the scope of the review.	Systematic review: the Cochrane Pregnancy and Childbirth Group's Trials Register (31 August 2015) and the World Health Organization (WHO) International Clinical Trials Registry Platform (ICTRP) (31 August 2015) was searched and relevant organizations were contacted to identify ongoing and unpublished studies.
38	Diaz et al.	2018	Portugal	Pregnant women (more specifically women with vaginal deliveries who were admitted in labour; Trial conducted between 2006 and 2007)	There was not report on postpartum anemia (defined as Hb lower than 9 mg/dL).	Systematic review: The Cochrane Pregnancy and Childbirth’s Trials Register (2 February 2018), ClinicalTrials.gov and the WHO International Clinical Trials Registry Platform (ICTRP; 21 March 2018), and the reference lists of studies was searched. All randomised trials, including cluster-randomised trials, evaluating methods for estimating blood loss after vaginal birth were included.Two review aut…
37	Langer et al.	2015	Portugal	Adolescent girls (10-19 years)	No specific country findings for anemia were presented; *In 2013, iron-deficiency anemia was among the top ten causes of disadjusted life years (DALYS) for 10-19 years-old adolescents girls (DALYS=5.1).	Analysis of existing and original evidence about the complex relations between women and health; Analysis of the major economic, environmental, social, political, demographic, and epidemiological transitions happening worldwide, their implications on the health system, and their effects on women and health; Analysis of the health status of girls and women using a life-course approach to show the …
36	Ruel et al.	2018	Mozambique	Children (0-3 years for Mozambique’s specific studies)	No specific country findings for anemia were presented	Revision of the nutrition impacts of agricultural programs with new empirical evidence published from 2014 onwards.
35	Gaffey et al.	2015	Mozambique	Children aged <12 years	No specific country findings for anemia were presented	Period:1990-2015;Revision of global and regional progress towards Millennium Development Goals (MDGs) 4 and 5 with respect to their indicators, drawing on data available from the relevant United Nations inter- agency groups responsible for maternal and child mortality estimation, as well as reports from individual UN agencies and external monitoring groups reporting on MDG progress
34	Duncan, Burris	2009	Mozambique	Pregnant women and infants	No specific country findings for anemia were presented.	Overview of the state of the world’s children from the late 1970s until the year 2008.
33	Black et al.	2013	Mozambique	Children<5years & Pregnant women	No specific country findings for anemia were presented. *Prevalence of stunting (HAZ <–2 Z scores below median) and overweight (BAZ >2 Z scores above median) for highest and lowest wealth quintiles for Mozambique (MICS 2006) were presented	Period: 2013; Results of trials of iron supplementation were used to work out the shift in the population hemoglobin distribution. Shifts' information from a meta-analysis on the effects of iron supplementation among pregnant women and children were applied to the distributions of hemoglobin estimated by Stevens and colleagues and the proportion of pregnant women with anemia whose blood hemoglobi…
32	Bhutta et al.	2013	Mozambique	Pregnant women & Children	No specific country findings for anemia were presented	Standard methods were used to do a comprehensive review of potential nutrition-specific interventions to address undernutrition and micronutrient deficiencies in women and children; The potential effect of delivery of these interventions on lives saved in the 34 countries with 90% of the global burden of stunted children was modeled and the effect of various delivery platforms that could enhance …
31	Arsenault et al.	2018	Mozambique	Pregnant women,Women of reproductive age (15–49 years) who had at least one livebirth in the past 2 years (MICS) or 5 years (DHS)	No specific country findings for anemia were presented; *In Mozambique, more than 90% of women accessed skilled antenatal care but less than 60% reported the three services (quality antenatal care). Mozambique had high levels of coverage but low and inequitable levels of quality	The availability of potential indicators of ante-natal care quality in household surveys was assessed.
30	Balarajan et al.	2011	Mozambique	Children of preschool age (0-5 years) & Pregnant women	Anaemia prevalence in mozambican children of preschool age (0-5 years) was severe(≥40·0%)	Period:1993-2005; Revision of understanding evidence of the epidemiology, clinical assessment, pathophysiology, and consequences of anemia, focusing on women of reproductive age and children in low-income and middle-income countries. Discussion of the multifactorial causes of anemia and the co-occurrence of multiple risk factors in different populations and identify potential barriers to effectiv…
29	Radeva-Petrova et al.	2014	Mozambique	Pregnant women (Trials, conducted between 1957 and 2008)	Of the two most recent trials, both large, and both administering two doses of sulfadoxine-pyrimethamine(SP), one trial from Mozambique demonstrated a benefit with chemoprevention(ofr maternal outcomes); One trial in Mozambique found a large effect in reducing the risk of cord blood anaemia (RR 0.49, 95% CI 0.30 to 0.80; one trial, 870 participants).	Systematic review: The Cochrane Infectious Diseases Group Specialized Register, CENTRAL, MEDLINE, EMBASE, LILACS, and reference lists up to 1 June 2014 were searched. Two review authors applied inclusion criteria, assessed the risk of bias, and extracted data. Dichotomous outcomes were compared using risk ratios (RR), and continuous outcomes using mean differences (MD); both were presented with 9…
28	González et al.	2018	Mozambique	Pregnant women (trials, antenatal care clinic settings)	Mefloquine probably results in fewer women anemic at delivery (when compared with sulfadoxine-pyrimethamine);Mefloquine plus cotri- moxazole probably results in little or no difference in maternal anaemia cases at delivery	Period:2010-2013; Systematic review: all records identified by the search strategy were screened by two review authors independently. Inclusion criteria were applied, risk of bias assessed, and data extracted. Trial authors were contacted for additional information when required. Dichotomous outcomes were compared using risk ratios (RRs), count outcomes as incidence rate ratios (IRRs), and contin…

## Sheet: Supplementary file 6. Descripti
Supplementary file 6. Description of the 20 articles relevant findings by thematic categories
Reference No.	Study, year and country	Study	Mentions on Mozambique/ Portugal	Target Group	Findings							Outcome definition	Comments
					Anemia and Iron deficiency anemia (IDA) prevalence, incidence, YLDs, DALYS	Micronutrient supplementation	Malaria and other infections	Stunting, Wasting and Overweight	Maternal mortality, newborn and child survival & Morbidity	Social and Structural determinants	Interventions & Programs
42	Vos Theo et al.,2016,UK	Systematic analysis/Secondary Research	Mozambique & Portugal	Children younger that 5 years old & Older children; Young adults (15-39 years old)	—“Anemia was the most common of our nine impairments, affecting 2·36 billion (2·35–2·37 billion) people in 2015.Iron deficiency was the cause of anaemia in more than half of all cases.” (Vos T et al, 2016, p1551) ——“The leading cause in children younger than 5 years was iron-deficiency anemia followed by skin diseases, protein-energy malnutrition, and diarrhoea. In older children, iron-deficiency…	-	-	-	-	—“SDI =0·060 in Mozambique in 1987 “ ——————-GBD 2015 location hierarchy by levels: Mozambique was classified as level 3 and Low SDI country (socio-demographic Index groupings by location, based on 2016 values); SDI 1980 = 0.089 increased to SDI 2015 =0.278).These values are a bit inferior to countries neighobours such as Tanzania (level 3 and Low SD;SDI 1980=0.246 and SDI 2015 =0,411)(Vos et al, …	-	SDI Socio-demographic Index Composite indicator of development status constructed for Global Burden Disease GBD 2015 whose components are strongly correlated with health outcomes. It is the geometric mean of 0 to 1 for indices of total fertility rate, mean education for those aged 15 years and older, and lag-distributed income per capita.	-
43	Vos Theo et al.,2017, UK	Systematic analysis/Secondary Research	Mozambique & Portugal	Childhood & Women in reproductive age and older women	—“In 2016, iron-deficiency anemia was among the ten causes with the greatest prevalence accounting for 1.24 billion cases (1.21 billion -1.28 billion).” (Vos et al., 2017,p.1229)—————————————————— “Globally, iron-deficiency anemia was among the five leading causes of YLDs in 2016, contributing 36·3 million (25.3–50.9 million [4.5%, 3.8–5.3]) of total YLDs. Iron-deficiency anemia was among the mai…	-	-—“Protein- energy malnutrition prevalence (by thousands) was of 128 948 (113 638 to 145 601) among a total of 1 821 783 (1 778 850 to 1 853 280) neglected tropical diseases and malaria, in 2016.” (Vos et al., 2017,p.1215)	—“Protein- energy malnutrition prevalence (by thousands) was of 63 135 (62 102 to 64 196) among a total of 1 673 391(1 633 390 -1 689 822) nutritional deficiencies, in 2016.” (Vos et al., 2017,p.1216)	-	—“ Iron-deficiency anaemia was the leading cause of YLDs in low-middle-SDI and low-SDI quintiles in 2016.” (Vos et al., 2017,p.1229)————————————————-—“GBD 2016 location hierarchy by levels: GBD 2016 location hierarchy with levels: Mozambique and Portugal were classified as level 3 countries(Vos et al, 2017, p730-742, supplementary files). ————————————————————-——	-	Prevalence Was estimated for nine impairments, disorders that are sequelae of multiple diseases and for which there were better data available to estimate the overall occurrence than for each underlying cause: anaemia, intellectual disability, epilepsy, hearing loss, vision loss, heart failure, infertility, pelvic inflammatory disease, and Guillain-Barré syndrome. Years lived with disability (YLD…	Ratio of observed YLDs to YLDs on basis of SDI in 2016= 0.98 (anemia was among the 10 leading causes of disability in Mozambique); *Anemia wasn’t among the 10 leading causes of disability in Portugal
40	Vos Theo et al., 2015, UK	Systematic analysis/Secondary Research	Mozambique & Portugal	Childhood & Individuals aged 15-49 years and 50-69 years	—"In developing countries, disorders such as anemia and neglected tropical diseases remained important contributors to health loss. (Vos et al., 2015,p.744).” ————————————————————-"Globally, iron-deficiency anemia total prevalence (x1000) decreased from 1211369.9(66.23%) in 1990 to 1208360.1(62.57%) in 2013 and total YLDS also decreased in the same period from 40035.5 (64.55%) to 36612.3 (59.51%)…	-	-“From 1990 to 2013, the number of anaemia cases due to malaria increased by 38·9%” (Vos et al., 2015, p766)	—“Protein- energy malnutrition prevalence (x1000) was 20 756.9 (16 985.3 - 25 759.4) and accounted for 36 663.5 (24 371.0 -53 084.7) YLDs (x1000) among a total of 2574.3 (1588.3 to 3920.3) YLDs nutritional deficiencies, in 2013).”(Vos et al., 2015, p.769).	-	-	-	Years lived with disability (YLDs) The metrics equal to the sum of prevalence multiplied by the general public’s assessment of the severity of health loss. Was used to explore patterns over time, age, sex, and geography	-"Portugal's prevalence cases iron-deficiency anemia were inferior to Spain's prevalence [that increased from 5,090.3 (4,913.6 -5,197.2) in 1990 to 5,907.3 (5,756.9 - 6,026.4) in 2013, % change prevalence of 15.9 (12.5 - 20.1). In Spain, for the same period, YLDs due to iron-deficiency increased from 137.8 (90.9 -201.5) to 145.2 (96.2 -213.4), with a % of change of 5.3(-0.2 to 12.0)." (Vos et al.…
44	Wang et al.,2016, UK	Secondary research	Mozambique & Portugal	Children under 5 years & Young adults and adults (15-70 years)	-“Regarding neonatal disorders, in 2015, globally, iron-deficiency anemia led to 54 200 deaths (35 100–72 900) compared to 48400 deaths (31900-63100) in 2005” (Wang et al., 2016, p1483)————————————— -“Neither iron-deficiency anemia nor nutritional deficiencies were among the ten leading causes of YLLs (with the ratio of observed YLLs to YLLs expected on the basis of SDI in 2015) in Mozambique and…	-	-“Anemia is a sequela of various different conditions, some of which are parasitic. Hookworm infections can cause iron-deficiency anemia which is then recorded as the underlying cause of death.” (Wang et al.2016, p1523)	-	-	-	-	-Country patterns of premature mortality (measured as years of life lost [YLLs] -Social demographic index(SDI) computations	No specific country findings for anemia were presented
47	Stanaway et al.,2018	Secondary research	Mozambique & Portugal	Children under 5 years & Women in reproductive age	Summary exposure value (SEV) for iron deficiency Year 1990 =12·69 (10·50 to 15·30) Year 2007= 10·78 (8·67 to 13·27) Year 2017 =9·70 (7·68 to 12·17)	-	-	-	-	-	-	GBD cause The name was changed from “iron-deficiency anemia” to “dietary iron deficiency” to clarify the focus on inadequate intake and exclusion of other causes that can manifest as absolute or functional iron deficiency. GBD risk factor “iron deficiency” - the exposure estimates were expanded to include all iron deficiency, irrespective of whether or not inadequate dietary intake is the underly…	No specific country findings for anemia were presented All sub causes of maternal disorders were added as outcomes of iron deficiency (the risk), leading to higher estimates of the burden attributable to iron deficiency among women of reproductive age; Dietary iron deficiency (the cause) is expressed in terms of prevalence and YLDs, but the exposure to iron deficiency (the risk) remained expresse…
45	Naghavi et al.,2017, UK	Secondary research	Mozambique & Portugal	Children under 5 years & Young adults and adults (15-70 years)	—Neither iron-deficiency anemia nor nutritional deficiencies were among the ten leading causes of total YLLs (with the ratio of observed YLLs to YLLs expected on the basis of SDI in 2016) in Mozambique and Portugal.	-	-	-	—“In 2016, globally, iron-deficiency anemia accounted for 114.4 (101.1 to 134.8)all age years of life lost among 19 504.7(17125.0- 22894.2) all age years of life lost due to nutritional deficiencies.”(Naghavi et al, 2017, p1168)	-	-	Years of life lost (YLLs) Measure of premature mortality. YLLs were calculated from the sum of each death multiplied by the standard life expectancy at each age.	No specific country findings for anemia were presented. Increasing levels of YLLs might reflect outcomes from conditions that required high levels of care but for which effective treatments remain elusive, potentially increasing costs to health systems.
41	Forouzanfar et al,2015,UK	Secondary research	Mozambique & Portugal	Females and Males	—“As a cluster, childhood undernutrition accounted for 1·3 million child deaths in 2013 and 120 million DALYs. Iron deficiency, vitamin A deficiency, and zinc deficiency each accounted for less than 200000 deaths; however, iron deficiency is a major cause of DALYs due to its crucial role as a cause of anaemia.”(Forouzanfar et al., 2015, p.2305) —In 2013, children undernutrition and iron deficienc…	-	-	-	-	-	-	DALYS Disability-adjusted life-years	Iron deficiency wasn't among the ten leading risk factors in terms of attributable DALYs for Portugal in 2013 for both sexes combined.————————————————————————————————————————————————————“The global pattern masks tremendous regional variation in the profile of risks, particularly in sub-Saharan Africa compared with the rest of the developing and developed world.” (Forouzanfar et al., 2015, p.2300)
46	Gakidou et al.,2017, UK	Secondary research	Mozambique & Portugal	Pregnant women, Children and Adults	— In 2016, globally, iron deficiency anemia accounted for 34823.71 (23 073.25 -49667.43) DALYS(in thousands)” (Gakidou et al, 2017, p.1383) —“Global age-standardised SEVs for iron deficiency (level 3 risk) among females increased from 8.36 (6.25 -10.98) in 1990 to 8.52 (6.38 -11.16) in 2016.”(Gakidou et al., 2017, p1371) —————————————-——“Iron deficiency (ID) was the 22nd ranked level 3 risk facto…	-	-	—“In 2016, malnutrition (11·5% [10.8–12.3] of DALYs) and diet (9.6% [8.2–11.1] of DALYs) was among the leading Level 2 risk factors in terms of attributable DALYs at the global level for both sexes combined.”(Gakidou et al., 2017, p1371)	-	GBD 2016 location hierarchy by levels: Mozambique was classified as level 3 and Low SDI country (socio-demographic Index groupings by location, based on 2016 values); SDI 1980 = 0.131 increased to SDI 2016 =0.306).These values are a bit inferior to countries neighobours such as Tanzania (level 3 and Low SD;SDI 1980=0.176 and SDI 2016 =0,428) and South Africa (level 3 and Middle SDI; SDI 1980=0,45…	-	DALYS Disability-adjusted life-years SDI Socio-demographic Index Composite indicator of development status constructed for Global Burden Disease GBD 2015 whose components are strongly correlated with health outcomes. It is the geometric mean of 0 to 1 for indices of total fertility rate, mean education for those aged 15 years and older, and lag-distributed income per capita.	No specific country findings for anemia were presented. —————————————————————————
35	Gaffey et al., 2015, USA	Review	Mozambique	Children aged <12 years	Not reported	— “Compared to no supplementation, prenatal iron and folic acid supplementation are associated with a 66% reduction in maternal anemia and an average 58 g increase in birth weight.”(Gaffey et al.,2015,p5). —“Intermittent iron supplementation in children aged <12 years is associated with a 49% lower risk of anemia and a 76% lower risk of iron deficiency. The use of micronutrient powders (MNPs) for…	—"Among effective interventions to prevent malaria morbidity and mortality in children are the intermittent preventive therapy with anti-malarial drugs, associated with reduced incidence of clinical malaria and severe malaria episodes and reduced risk of moderately severe anemia.” ”(Gaffey et al., 2015, p6)		—“Interventions during the preconception, pregnancy, delivery and newborn periods, such as a) preconception and pregnancy - folic acid supplementation/fortification and multiple micronutrient supplementation (including iron and folic acid); and, b) basic and advanced antenatal care - prevention of malaria with insecticide-treated bed nets or intermittent preventive treatment with antimalarial dru…	—-“Increased attention must also be paid to the underlying social and structural determinants of maternal, newborn, and child morbidity and mortality (poverty, illiteracy, and girls' and women's disempowerment) as well as to the implementation of equity approaches to facilitate universal access to health and the scale-up of community-based delivery platforms in order to bring fundamental positive…	-	-	—-Gathered general data only: no anemia-specific results linked to Mozambique were presented.
33	Black et al., 2013, UK	Review	Mozambique	Children<5years & Pregnant women	Anemia prevalence in pregnant women(%) in 2011: IDA total anemia (95 % CI): Africa = 20.3 (18.3-22.4) Southern Africa = 16.7 (6.6-27.5) Asia = 19.8 (15.8-23.5) Europe = 16.2 (12.6-19.7) Southern Europe = 16.8 (10.6-23.8) Anemia prevalence in under -5 children (%), in 2011: IDA total anemia (95 % CI): Africa = 20.2 (18.6-21.7) Southern Africa = 20.3 (9.7-32.5) Asia = 19.0 (14.5-23.4) Europe = 12.1…	—“There is strong biological plausibility for a causal link between maternal IDA and adverse birth outcomes includ- ing low birthweight and increased perinatal mortality.” (Black et al., 2013, p430) —“Randomised controlled trials from high-income countries have shown benefits of iron supplementation for improved maternal mental health and reduced fatigue, but evidence is scarce for LMICs.” (Black…	-	—According to MICS 2006, in Mozambique, the prevalence of stunting was higher in the lowest wealth quintile compared to the highest wealth quintile, while, for overweight there were no major differences among quintiles.	—“Studies showed that anemia in pregnancy increases the risk of maternal mortality”(Black et al., 2013, p430) OR for maternal deaths was 0·71 (95% CI 0·60–0·85) for a 10 g/L greater mean haemoglobin in late pregnancy. —“Anaemia is probably a particularly important risk factor for haemorrhage, the leading cause of maternal deaths (23% of total deaths)” (Black et al., 2013, p445) —“Iron deficiency …	-	-	Anemia - Prevalence of iron amenable or iron deficiency anemia (IDA) or severe IDA: proportion of anemia or severe anemia that would be reduced if only iron was provided, holding other determinants of anemia unchanged. Stunting -HAZ<–2Z scores below median Overweight - BAZ >2 Z scores above median	—-Gathered general data only; no anemia-specific findings linked to Mozambique were presented.
31	Arsenault et al.,2018, USA	Secondary research	Mozambique	Pregnant women,Women of reproductive age (15–49 years) who had at least one livebirth in the past 2 years (MICS) or 5 years (DHS)	-	-	-	-	-	Antenatal care quality, in 2011: Mozambique = 38·6% (Low coverage and equity. Thus showing greater inequalities) (Arsenault et al., 2018, pe1192)————————————————- —-“For example, in Mozambique, more than 90% of women accessed skilled antenatal care but less than 60% reported the three services” (Arsenault et al., 2018, pe1190)	-	Antenatal care quality -Proportion of women who report blood pressure monitoring and urine and blood testing at any point during the pregnancy among those who had at least one visit with a skilled antenatal care provider.	—-Gathered general data only; no anemia-specific findings linked to Mozambique were presented.
36	Ruel et al., 2018, USA	Review	Mozambique	Children (0-3 years for Mozambique’s specific studies)	-	—“A study carried in Senegal that used an enhanced homestead food - EHFP or a dairy value chain platform to distribute micronutrient-fortified sprinkles or yogurt targeted to young children reported impacts on anemia and Hb. Thus agricultural programs could be effective platforms to deliver micronutrient-fortified products targeted to young children.” (Ruel et al., 2018, p20)	-	-	-	-	—“Some studies carried in Burkina Faso and Nepal reported positive impacts of enhanced homestead food production programs on child anemia, but larger impacts when water, sanitation, and hygiene (WASH) intervention was added to the program's package of interventions, and even larger impacts when both WASH and a small-quantity lipid-based nutrient supplement for young children were integrated into …	-	—Only reported findings on the effectiveness of biofortification of orange-fleshed sweet potato (OSP) and its impact on vitamin A intake among Mozambican mothers and young children. No anemia-specific findings linked to Mozambique were presented.
32	Bhutta et al., 2013, UK	Review	Mozambique	Pregnant women & Children	—“Reviews showed that daily iron supplementation to women during pregnancy reported a 70% reduction in anemia at term, a 67% reduction in iron deficiency anemia (IDA), and a 19% reduction in the incidence of low birthweight. And similar findings were reported in women that received intermittent iron supplementation, or iron and folic acid supplementation.” (Bhutta et al., 2013, p454)	—“Meta-analysis of multiple micronutrient fortification in children showed an increase in haemoglobin concentrations by 0·87 g/dL (95% CI 0.57–1.16) and reduced risk of anaemia by 57% (RR 0.43; 95% CI 0.26–0.71).Other studies have shown that iron fortification of foods resulted in a 41% reduction in the risks of anemia (RR 0.59, 95% CI 0.48–0.71, p< 0.001) and a 52% reduction in deficiency (0.48,…	-	—Mozambique is among 34 countries with the highest burden of malnutrition and that account for 90% of the global burden of malnutrition. % of stunting in Mozambique = 43.7(survey year 2008) Mozambican Population affected covering 90% of total child stunted population, in 2008: Numbers stunted = 1673,6; Cumulative % = 78.7	—“"Ronneberg and colleagues showed that the risk of being born low birthweight was significantly greater with moderate preconception anaemia (OR 6.5, 95% CI 1.6–26.7) and fetal growth restriction (4.6, 95% CI 1.5–13.5).”(Bhutta et al., 2013, p455)—————— —“Findings support the potential replacement of iron-folate supplements in pregnancy with multiple micronutrient supplements in populations at ri…	“	——“Meta-analysis of multiple micronutrient fortification in children showed an increase in haemoglobin concentrations by 0·87 g/dL (95% CI 0.57–1.16) and reduced risk of anaemia by 57% (RR 0.43; 95% CI 0.26–0.71).Other studies have shown that iron fortification of foods resulted in a 41% reduction in the risks of anemia (RR 0.59, 95% CI 0.48–0.71, p< 0.001) and a 52% reduction in deficiency (0.48…	-	- Reported findings on stunting and interventions to tackle the burden of malnutrition in Mozambique. No anemia-specific findings linked to Mozambique were presented.
30	Balarajan et al., 2011, UK	Review	Mozambique	Children of preschool age (0-5 years) & Pregnant women	Regional prevalence of anemia in children on preschool age (0-5 years), 1993–2005 (WHO Global Database): Africa = 64.6 % ;Asia = 47.7%; Europe = 16.7 % Anemia prevalence in mozambican children of preschool age (0-5 years), 1993–2005 (WHO Global Database): was severe(≥40·0%)	-“Meta-analysis of 14 randomised controlled trials and other trials of deworming in sub-Saharan Africa and Asia showed a significant increase in mean haemoglobin (1.71 g/L, 95% CI 0.70–2.73), with an increased response in those provided with iron supplementation. Evidences also showed the beneficial effect of anthelmintic treatment in pregnant populations, and the differential effects of coadmini…	—Based in previous studies’s analysis , the authors conclude that “Treatment of children with iron supplements should be accompanied by adequate screening for and treatment of malaria.”((Balajaran et al., 2011, p2129)—“Analysis of nine trials of 5445 children examining the effect of malaria chemoprophylaxis and intermittent prevention revealed significant reduction of severe anaemia (RR 0·70, 95%…	-	—“Maternal iron deficiency increase the vulnerability of infants to iron deficiency and anemia. Low- birthweight and preterm infants are at increased risk because they are born with reduced iron stores.” (Balajaran et al., 2011, p2127)—“Several studies have investigated the effectiveness of iron supplementation (with or without folic acid) in pregnant women; systematic review of 49 randomised and…	“Pooled analysis that included among other African countries, neighbor-countries of Mozambique such as Malawi, Tanzania, Eswatini and Madagascar, showed that the risk of anaemia among women living in the lowest wealth quintiles was 25% higher than among those in the highest wealth quintile. Women with no education were more likely to be anaemic than were those with greater than secondary educatio…	—“Adolescents are also a key group, with adolescent girls being targeted for intervention before the onset of childbearing.” (Balajaran et al., 2011, p2124)—————“Although antenatal care coverage is improving, gaps in the delivery of specific interventions (such as iron and folic acid supplementation) remain.Inadequate investment in financial and human resources hampers the implementation of mater…	Anemia: - — Haemoglobin concentration of less than 120 g/L for women, less than 110 g/L for pregnant women, and less than 110 g/L for children, adjusted for altitude. Haemoglobin concentration (g/L): Pregnant women <110 Children (0·5–4·9 years) <110 Children (5·0–11·9 years) <115	-“Africa and Asia are the most heavily affected regions, with Africa having the highest prevalence of anaemia, and Asia bearing the greater absolute burden .” (Balajaran et al, 2011, p2123) ———————————————————————————“In most settings, anaemia is a marker of socioeconomic disadvantage, with the poorest and least educated being at greatest risk of exposure to risk factors for anaemia and its seque…
34	Duncan, Burris, 2009, USA	Review	Mozambique	Pregnant women and infants	-	-	-	-	—“Complications from a teen pregnancy are numerous and include a high percentage of school dropouts as well as a high prevalence of anemia, and due to the smaller pelvis of young mothers, obstructed labor is more frequent.”(Burris, 2009, p310) —“In the short term this is responsible for considerable morbidity and mortality. Long-term consequences include a diminution in cognitive abilities and le…	—“In 1990, half of the pregnant women in the developing world suffered from iron deficiency anemia. These women were tired and having difficulty doing all the chores of daily living, and were at an increased risk of death in childbirth. Their infants were more likely to be small, with lower birth weights and with impaired development" (Burris, 2009, p312)	-	-	No specific country findings for anemia were presented.
28	González et al., 2018, USA	Review (Cochrane)	Mozambique	Pregnant women (trials, antenatal care clinic settings)	Six trials that included 8192 pregnant women were conducted between 1987 and 2013 in Thailand , Benin, Gabon, Tanzania, Mozambique (2/6), and Kenya. -Mefloquine decreased maternal anaemia at delivery (RR 0.84, 95% CI 0.76 to 0.94; 5469 participants, 2 studies; moderate-certainty evidence). Mefloquine results in little or no difference in the incidence of clinical malaria episodes during pregnancy…	-	—“Mefloquine was more efficacious than sulfadoxine-pyrimethamine in HIV-uninfected women or daily cotrimoxazole prophylaxis in HIV-infected pregnant women for prevention of malaria infection and was associated with lower risk of maternal anaemia, no adverse effects on pregnancy outcomes (such as stillbirths and abortions), and no effects on low birth weight and prematurity. However, the high prop…	-	-	-	-	-	—Mefloquine probably results in fewer women anemic at delivery (when compared with sulfadoxine-pyrimethamine);Mefloquine plus cotrimoxazole probably results in little or no difference in maternal anaemia cases at delivery.
29	Radeva-Petrova et al., 2014, USA	Review (Cochrane)	Mozambique	Pregnant women (Trials, conducted between 1957 and 2008)	Seventeen trials enrolling 14,481 pregnant women were conducted between 1957 and 2008, in Nigeria, The Gambia, Kenya, Mozambique (2/17 trials), Uganda, Cameroon, Burkina Faso, and Thailand. For women in their first or second pregnancy, malaria chemoprevention reduces the risk of moderate to severe anaemia by around 40% (RR 0.60, 95% CI 0.47 to 0.75; three trials, 2503 participants, high quality e…	-	—"Routine chemoprevention to prevent malaria and its consequences has been extensively tested in RCTs, with clinically important benefits on anaemia and parasitaemia in the mother, and on birthweight in infants.” (Radeva-Petrova et al., 2014, p2)	-	-	-	-	The definition of severe anaemia was variable; Hb < 8 g/dL, Hb < 7g/dL, or Packed cell volume (PCV) < 21%.	-Challis 2004 MOZ: Trial design: RCT Data collected: 2001 to 2002 urban/rural: both (women from Matola - town and Boane - village). Participants: 600,nulliparous and primiparous women under 21 years -Menendez 2008 MOZ :Trial design: RCT Data collected: August 2003 to April 2005. urban. Participants:1030, permanent residents of the CISM trial area with gestational age ≤ 28 weeks.
37	Langer et al., 2015, UK	Review	Portugal	Adolescent girls (10-19 years)	-“Undernutrition is a concern. Iron-deficiency anaemia is the second most common cause of DALYs for women aged 15–49 years worldwide, with the greatest burden reported in Africa and Asia.” (Langer et al., 2015,p15) -*In 2010, iron-deficiency anemia was among the top ten causes of disadjusted life years (DALYS) for 10-19 years-old adolescents girls (DALYS=5.1, third cause\Total number of DALYs for…	-	-	—“The prevalence of low BMI and stunting among adolescent girls, for example, is estimated to be 1·73% in east Africa, 1·57% in central Africa, and 2·0% in southern Africa.” (Langer et al., 2015,p14)————————— -“Girls who enter adolescence stunted are unlikely to make substantial gains in growth.Although malnutrition and stunting are extremely serious health problems in some countries, nutritional…	—“The most important risk factors for mortality for girls aged 15-19 years old are intimate partner violence, alcohol use, iron-deficiency anaemia, and childhood sexual abuse.” (Langer et al., 2015,p13)————————— -“Iron-deficiency anaemia accounts for a substantial portion of DALYs among girls aged 15–19 years through its contribution to cognitive impairment, susceptibility to infection, and limit…	-	-	DALYs Disability- adjusted life-years	—-Gathered general data only; no anemia-specific findings linked to Portugal were presented.
39	De-Regil et al., 2015, USA	Review (Cochrane)	Portugal	Cohort study of births (1988-1988) in 10 countries (including Portugal)	-	-	-	-	-	-	-	-	No specific country findings for anemia were presented, as the study design of the research mentioned was out of the scope of the review.
38	Diaz et al, 2018, USA	Review (Cochrane)	Portugal	Pregnant women (more specifically women with vaginal deliveries who were admitted in labour; Trial conducted between 2006 and 2007)	-“There was not report on postpartum anemia, blood loss greater than 500 mL, or maternal infection.” (Diaz et al., 2018, p2)	-	-	-	-	-	-	Postpartum anemia Hb lower than 9 mg/dL	-Zhang 2010: Randomised trial in 78 maternity units from 13 European countries:Austria,Belgium, Denmark,Finland, France, Hungary, Ireland, Italy, Netherlands, Norway, Portugal (5/13),Spain, and Switzerland. Participants: all 25,381 women with vaginal deliveries who were admitted in labour to the 78 maternity units participating in the study.

## Sheet: Supplementary file 7. Descripti
Supplementary file 7. Description of 05 articles identified on the updated search
Reference No.	Author	Year of Publication	Mentions on Mozambique/Portugal	Target Group	Mozambique/Portugal Specific Findings	Period of anaylsis/ Analysis performed	General findings related to anemia and/ or micronutrients deficiencies
70	Keats et al.	2021	No	Women in reproductive age, Pregnant women and children under five	Not reported	-	-
71	Aggett, P	2020	No	Pregnant women and children under five	Not reported	-	-
72	Heidkamp et al.	2021	Mozambique	Adolescents, especially girls aged 10–19 years, pregnant women and childhood	Not reported	-	-“Maternal multiple micronutrient supplements were recommended over iron folic acid (IFA) in the 2013 Lancet Series on maternal and child nutrition, citing evidence for improved birth outcomes.”(Heidkamp et.al, 2021, p1403) -“As of 2019, the WHO GINA includes Mozambique among five countries with policies allowing for multiple micronutrient supplement delivery.”(Heidkamp et.al, 2021, p1403)
73	Hollis et al.	2020	No	Infants, children and adolescents	Not reported	-	-“ In contexts where anemia is prevalent, daily iron supplementation or fortification of foods is recommended to improve hemoglobin and iron status. The use of iron-containing micronutrient powders for point-of-use food fortification has been suggested as an alternative to overcome the constraints associated with national fortification or supplementation programs in certain contexts. WHO recommen…
74	González-Rábago et al.	2021	Portugal	Childhood, Adolescents, Young adults	Not reported	-	-
Notes	Period searched: 01 th January 2019-17th November 2021. We identified a total of 123 articles using the same search criteria and electronic databases. Screening of duplicates was performed and 04 articles were deleted. Using the same exclusion criteria a total of 114 articles were excluded (71/123 other population/country; 29/123 does not address anemia; 18/123 articles without abstract and/or fu…
